# Supplementary material
Source: PubMed Central journal article supplement (PMC5404595)
Supplement: AAC.02532-16_zac004176089s1.pdf [file AAC.02532-16_zac004176089s1.pdf]

**Table S1.** ORFs identified in plasmid pJB12.

| <b>Gene name</b>                | <b>Position</b>  | <b>Length</b> | <b>Direction</b> | <b>Function</b>                               | <b>Amino acid Identity (GenBank accession number)</b> |
|---------------------------------|------------------|---------------|------------------|-----------------------------------------------|-------------------------------------------------------|
| <i>repA</i>                     | 30141 -<br>1198  | 1419          | Reverse          | Putative plasmid replicase                    | 88% RepA pMATVIM-7 (CAO91756.1)                       |
| <i>parB</i>                     | 1812 -<br>2027   | 216           | Reverse          | Plasmid stabilization and partitioning system | 80% ParB pNOR-2000 (AGG19226.1)                       |
| <i>parA</i>                     | 2048 -<br>2680   | 633           | Reverse          | Plasmid stabilization and partitioning system | 97% ParA pNOR-2000 (AGG19225.1)                       |
| <i>res</i>                      | 3052 -<br>3798   | 747           | Reverse          | Putative resolvase                            | 74% Res pMATVIM-7 (CAO91761.1)                        |
| <i>pJB12.5</i>                  | 3998 -<br>4540   | 543           | Reverse          | Putative transposase                          | 100% TnpA pAX22 (YP_008508469.1)                      |
| <i>t/at1</i>                    | 4546 -<br>4941   | 396           | Reverse          | Toxin/antitoxin system                        | 100% T/AT2 pAX22 (YP_008508471.1)                     |
| <i>t/at2</i>                    | 4938 -<br>5189   | 252           | Reverse          | Toxin/antitoxin system                        | 100% T/AT1 pAX22 (YP_008508470.1)                     |
| <i>pJB12.8</i>                  | 5254 -<br>5937   | 684           | Forward          | Putative invertase                            | 100% Putative recombinase pAX22 (YP_008508472.1)      |
| <i>intI1</i>                    | 6284 -<br>7297   | 1014          | Reverse          | Class 1 integrase                             | 100% IntI1 (AAK19119.1)                               |
| <i>aacA7</i>                    | 7444 -<br>7902   | 459           | Forward          | Aminoglycoside N(6')-acetyltransferase type 1 | 100% AAC(6')-II (AAK19120.1)                          |
| <i>bla<sub>VIM-2</sub></i>      | 8055 -<br>8855   | 801           | Forward          | Metallo- $\beta$ -lactamase                   | 100% VIM-2 (AAK19121.1)                               |
| <i>aacC1</i>                    | 8949 -<br>9413   | 465           | Forward          | 3-N-aminoglycoside acetyltransferase          | 100% AAC(3')-I (AAK19122.1)                           |
| <i>aacA4</i>                    | 9534 -<br>10088  | 555           | Forward          | Aminoglycoside N(6')-acetyltransferase type 2 | 100% AAC(6')-Ib' (AAK19123.1)                         |
| <i>qacE<math>\Delta</math>1</i> | 10257 -<br>10604 | 348           | Forward          | SMR family efflux pump                        | 100% QACE $\Delta$ 1 (AAK19124.1)                     |
| <i>sulI</i>                     | 10598 -<br>11437 | 840           | Forward          | Sulfonamide resistance                        | 100% SUL-1 (AAK19125.1)                               |
| <i>orf5</i>                     | 11469 -<br>12065 | 597           | Forward          | Hypothetical protein                          | 100% hypothetical protein (AAK19126.1)                |

|                            |                  |      |         |                                           |                                                                       |
|----------------------------|------------------|------|---------|-------------------------------------------|-----------------------------------------------------------------------|
| <i>tniB</i>                | 12034 -<br>13002 | 969  | Reverse | ATP-binding                               | 95% TniBΔ3 pAX22<br>(YP_008508481.1)                                  |
| <i>tniA</i>                | 13029 -<br>14744 | 1716 | Reverse | Putative<br>transposase                   | 100% TniA pAX22<br>(YP_008508482.1)                                   |
| <i>arsR</i>                | 14955 -<br>15287 | 333  | Forward | Metalloregulatory<br>repressor            | 91% ArsR pAB3 (AKQ28764.1)                                            |
| <i>arsH</i>                | 15284 -<br>16051 | 768  | Forward | Oxidoreductase                            | 95% ArsH pAB3<br>(AKQ28783.1)                                         |
| <i>arsC</i>                | 16048 -<br>16554 | 507  | Forward | Arsenate reductase                        | 85% Arsenic reductase pAB3<br>(AKQ28782.1)                            |
| <i>arsB</i>                | 16551 -<br>17612 | 1062 | Forward | Arsenic pump<br>membrane                  | 95% Arsenic transporter<br>pAB3 (AKQ28781.1)                          |
| <i>pJB12.2</i><br><i>3</i> | 17667 -<br>17969 | 303  | Forward | Putative plasmid<br>stabilization protein | 84% Putative plasmid<br>stabilization protein<br>pRWC72a (AFV47236.1) |
| <i>pJB12.2</i><br><i>4</i> | 17966 -<br>18253 | 288  | Forward | Putative plasmid<br>stabilization protein | 86% Putative plasmid<br>stabilization protein<br>pRWC72a (AFV47237.1) |
| <i>pJB12.2</i><br><i>5</i> | 18425 -<br>18796 | 372  | Forward | Hypothetical<br>protein                   | 76% hypothetical protein<br>pMRVIM0713 (AKJ19124.1)                   |
| <i>pJB12.2</i><br><i>6</i> | 18793 -<br>19044 | 252  | Forward | Hypothetical<br>protein                   | 100% Growth regulator HB13<br>(ERF04107.1)                            |
| <i>pJB12.2</i><br><i>7</i> | 19177 -<br>19473 | 297  | Reverse | Hypothetical<br>protein                   | 100% hypothetical protein<br>HB13 (ERF04108.1)                        |
| <i>pJB12.2</i><br><i>8</i> | 19564 -<br>20493 | 930  | Reverse | Putative serine<br>protease               | 94% TNCP23 pKLC102<br>(AAP22630.1)                                    |
| <i>pJB12.2</i><br><i>9</i> | 20492 -<br>20770 | 279  | Forward | Hypothetical<br>protein                   | 92% TNCP22b pKLC102<br>(AAP22629.1)                                   |
| <i>traA</i>                | 21227 -<br>24631 | 3405 | Reverse | Conjugal transfer                         | 94% TraA pNOR-2000<br>(AGG19209.1)                                    |
| <i>traC</i>                | 24690 -<br>24941 | 252  | Forward | Conjugal transfer                         | 87% TraC pNOR-2000<br>(AGG19208.1)                                    |
| <i>traD</i>                | 24964 -<br>25185 | 222  | Forward | Conjugal transfer                         | 93% TraD pNOR-2000<br>(AGG19207.1)                                    |
| <i>traG</i>                | 25220 -<br>27742 | 2523 | Forward | Conjugal transfer                         | 93% TraG pNOR-2000<br>(AGG19206.1)                                    |
| <i>pJB12.3</i><br><i>4</i> | 27752 -<br>28144 | 393  | Forward | Hypothetical<br>protein                   | 89% hypothetical protein<br>pAMBL1 (AKH45393.1)                       |
| <i>kfrA</i>                | 28316 -<br>29344 | 1029 | Reverse | Transcriptional<br>regulation             | 91% KfrA pNOR-2000<br>(AGG19205.1)                                    |

---

|                       |         |     |         |              |                          |
|-----------------------|---------|-----|---------|--------------|--------------------------|
| <b><i>pJB12.3</i></b> | 29547 - | 309 | Reverse | Hypothetical | 96% hypothetical protein |
| <b>6</b>              | 29855   |     |         | protein      | pMRVIM0713 (AKJ19104.1)  |

---
